# Supplementary material for: In Situ Corn Fiber Conversion for Ethanol Improvement by the Addition of a Novel Lignocellulolytic Enzyme Cocktail
Source: MDPI journal article supplement (doi:10.3390/jof8030221), 2022-02-23

Supplemental Figure S1 The color change of DDGS with/without lignocellulolytic enzymes addition.

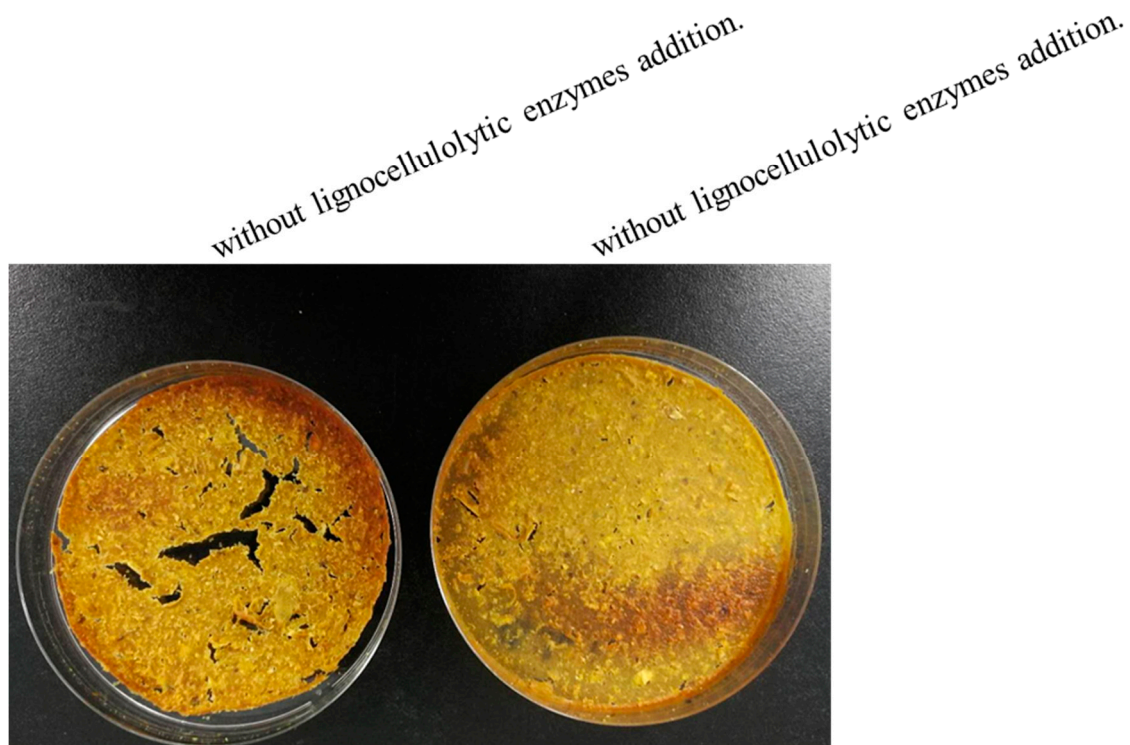

Supplemental Figure S2 The effect of different enzyme loadings on ethanol yield

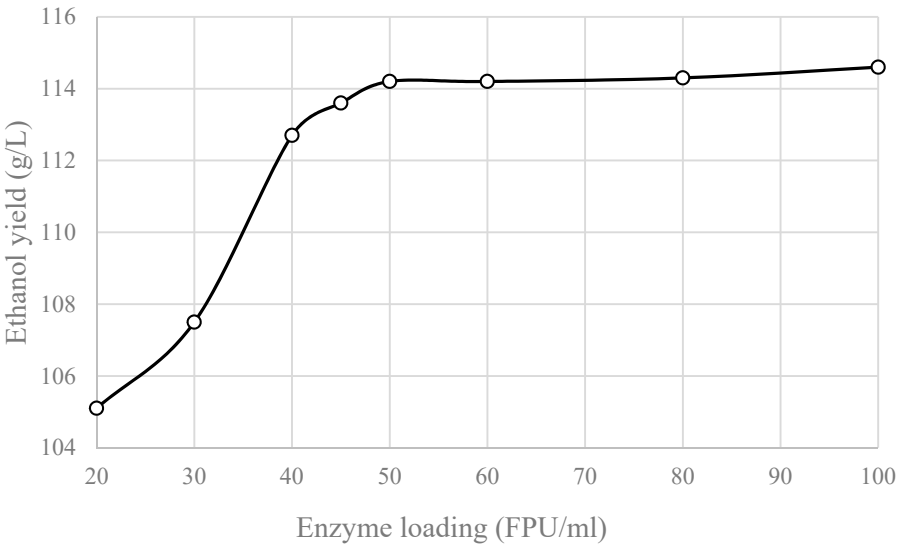

Supplement: s1 [file s1]
